# Supplementary material for: A Comprehensive Analysis of the Intrinsic Visible Fluorescence Emitted by Peptide/Protein Amyloid-like Assemblies
Source: MDPI journal article supplement (doi:10.3390/ijms24098372), 2023-05-06
Supplement: s1 [file s1]

## Supplementary materials

# A Comprehensive Analysis of the Intrinsic Visible Fluorescence Emitted by Peptide/Protein Amyloid-like Assemblies

Nicole Balasco <sup>1</sup>, Carlo Diaferia <sup>2</sup>, Elisabetta Rosa <sup>2</sup>, Alessandra Monti <sup>3</sup>, Menotti Ruvo <sup>3</sup>, Nunzianna Doti <sup>3,\*</sup> and Luigi Vitagliano <sup>3,\*</sup>

<sup>1</sup> Institute of Molecular Biology and Pathology, National Research Council (CNR), Piazzale Aldo Moro 5, 00185 Rome, Italy; nicole.balasco@cnr.it

<sup>2</sup> Department of Pharmacy and CIRPeB, Research Centre on Bioactive Peptides “Carlo Pedone”, University of Naples “Federico II”, Via Montesano 49, 80131 Naples, Italy; carlo.diaferia@unina.it (C.D.); elisabetta.rosa@unina.it (E.R.)

<sup>3</sup> Institute of Biostructures and Bioimaging (IBB), National Research Council (CNR), 80131 Napoli, Italy; alessandra.monti@ibb.cnr.it (A.M.); menotti.ruvo@unina.it (M.R.)

\* Correspondence: nunzianna.doti@cnr.it (N.D.); luigi.vitagliano@unina.it (L.V.)

**Table S1.** Literature survey protocol and outcome.

| PUBMED QUERY                         | TOTAL PAPERS | PAPERS OF INTEREST<br>BASED ON THE ABSTRACT |
|--------------------------------------|--------------|---------------------------------------------|
| amyloid "intrinsic fluorescence"     | 142          | 33                                          |
| amyloid peptide visible luminescence | 15           | 7                                           |
| amyloid protein visible luminescence | 20           | 1                                           |
| amyloid photoluminescence            | 27           | 6                                           |
| amyloid label-free fluorescence      | 54           | 12                                          |
| amyloid autofluorescence             | 95           | 28                                          |
